# Supplementary material for: High antimicrobial photodynamic activity of photosensitizer encapsulated dual-functional metallocatanionic vesicles against drug-resistant bacteria S. aureus
Source: Royal Society of Chemistry journal article supplement (doi:10.1039/d0bm00323a), 2020-01-01
Supplement: d0bm00323a1.pdf [file d0bm00323a1.pdf]

## Supplementary Information

### High antimicrobial photodynamic activity of photosensitizer encapsulated dual-functional metallocatanionic vesicles against drug-resistant bacteria *S. aureus*

Bunty Sharma<sup>a</sup>, Gurpreet Kaur<sup>a\*</sup>, Ganga Ram Chaudhary<sup>a\*</sup>, Santosh L Gawali<sup>b,c</sup>, PA Hassan<sup>b,c</sup>

<sup>a</sup>Department of Chemistry and Centre of Advanced studies in Chemistry, Panjab University, Chandigarh

<sup>b</sup>Homi Bhabha National Institute, Training School Complex, Anushaktinagar, Mumbai-400 094, India

<sup>c</sup>Chemistry Division, Bhabha Atomic Research Centre, Trombay, Mumbai – 400 085, India

**Table S1:** SAXS parameters of CuCPCII AOT (70:30) and CuCPCII AOT (30:70) obtained by model fitting with Vesicle model and 0.1 polydispersity (Schulz) included in core radius.

| Sample Name           | Core Radius (Å) | Inner Shell thickness (Å) | Hydrophobic Shell thickness (Å) | Outer Shell thickness (Å) | Inner Shell SLD (Å <sup>-2</sup> ) | Hydrophobic Shell SLD (Å <sup>-2</sup> ) | Outer shell SLD (Å <sup>-2</sup> ) | $\chi^2$ |
|-----------------------|-----------------|---------------------------|---------------------------------|---------------------------|------------------------------------|------------------------------------------|------------------------------------|----------|
| 1%CuCPCII AOT (70:30) | 176.5 ±2.6      | 10.3 ±0.3                 | 13.1 ±0.2                       | 17.0±0.1                  | 10.5 ±0.2                          | 6.8 ±0.2                                 | 12.3 ±0.2                          | 1.2      |
| 1%CuCPCII AOT (30:70) | Low scattering  |                           |                                 |                           |                                    |                                          |                                    |          |
| 2%CuCPCII AOT (70:30) | 193.0 ±1.8      | 10.3 ±0.3                 | 13.2 ±0.2                       | 17.0±0.1                  | 10.1 ±0.2                          | 6.8 ±0.1                                 | 11.8 ±0.4                          | 1.4      |
| 2%CuCPCII AOT (30:70) | Low scattering  |                           |                                 |                           |                                    |                                          |                                    |          |

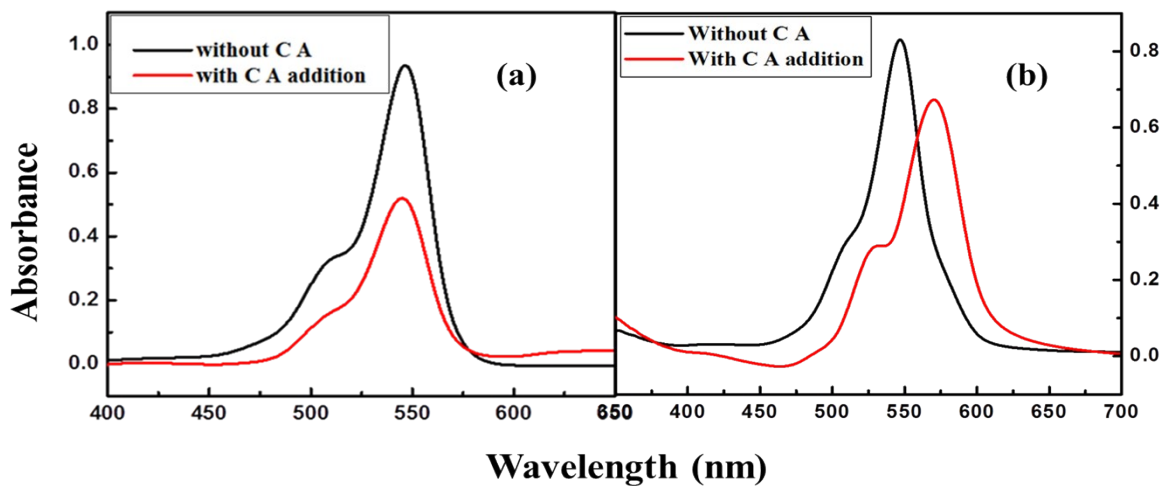

**Figure S1.** UV-Visible absorption spectra of RB without addition (black) of CuCPCII:AOT and with (red) (a) CuCPCII:AOT (30:70) and (b) CuCPCII:AOT (70:30) addition.

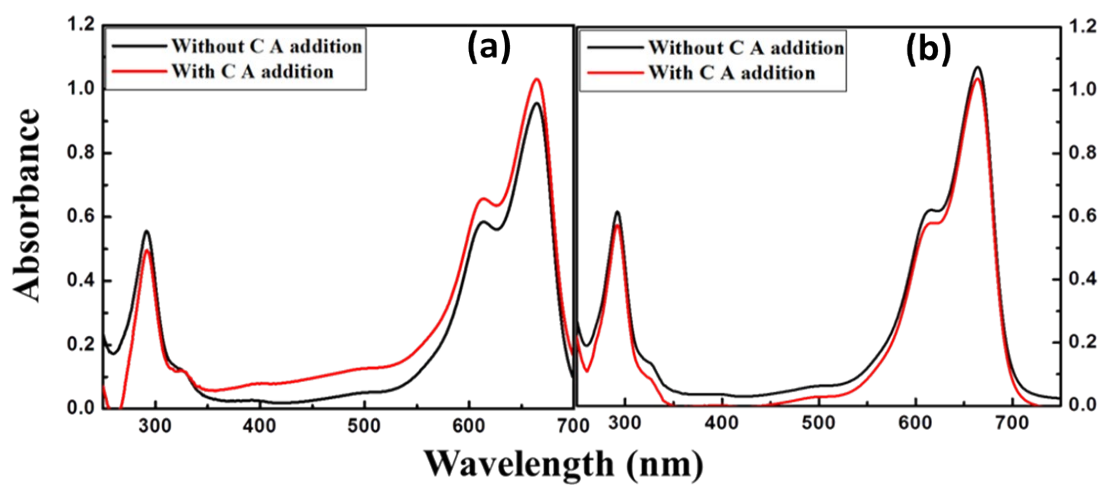

**Figure S2.** UV-Visible absorption spectra of MB without addition (black) of CuCPCII:AOT and with (red) (a) CuCPCII:AOT (30:70) and (b) CuCPCII:AOT (70:30) addition.

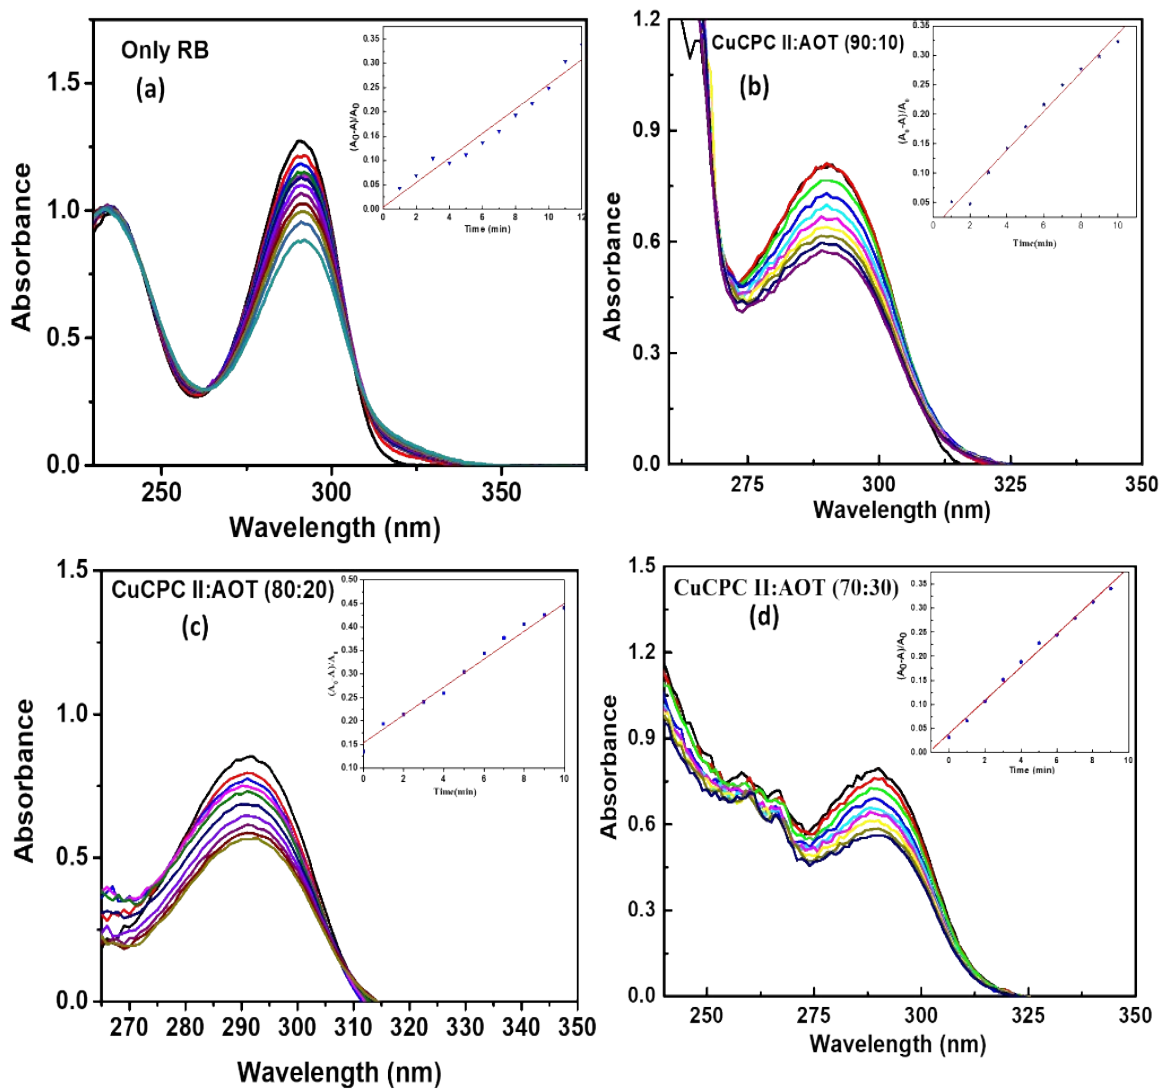

**Figure S3.** Graph of Uric acid quenching in presence of (a) pure RB dye, (b) RB with CuCPC II:AOT (10:90) mixture, (c) RB with CuCPC II:AOT (20:80) , (d) RB with CuCPC II:AOT (30:70) mixture irradiation.

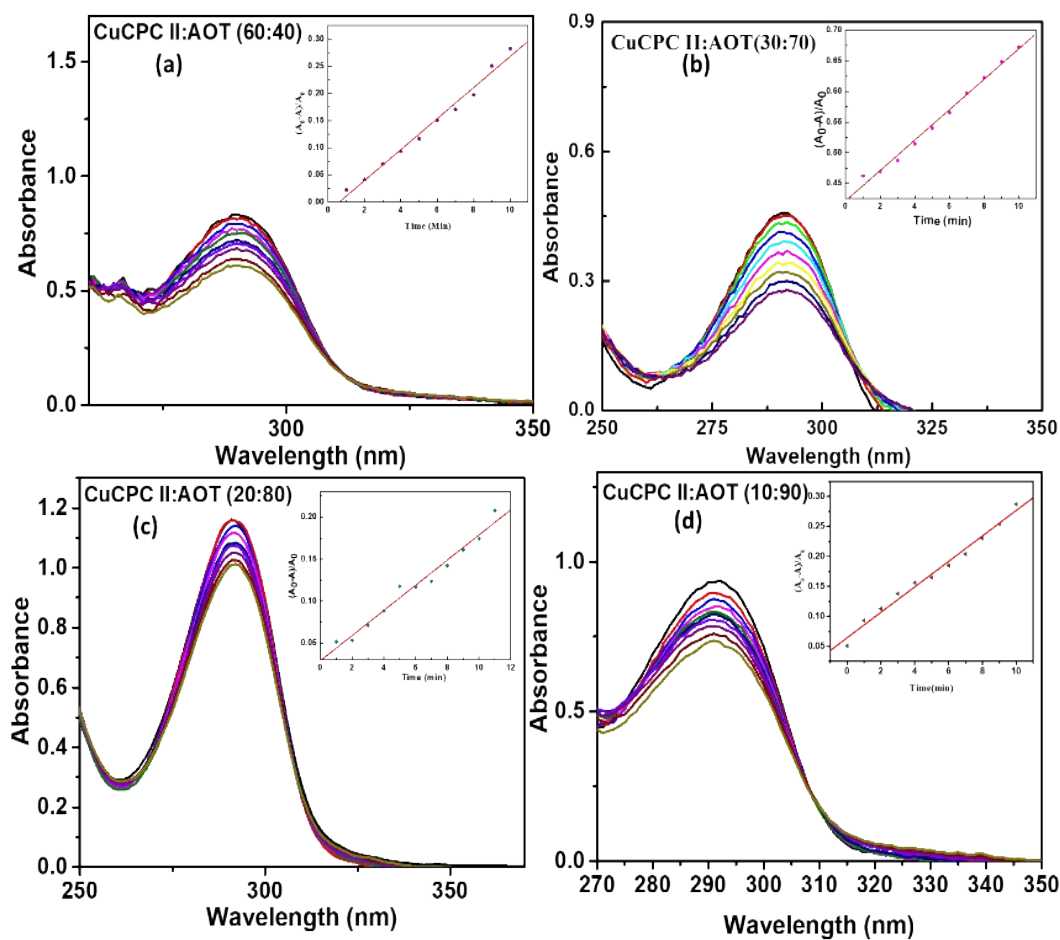

**Figure S4.** Graph of Uric acid quenching in presence of (a) RB with CuCPC II:AOT (60:40), (b) RB with CuCPC II:AOT (30:70), (c) RB with CuCPC II:AOT (20:80) and (d) RB with CuCPC II:AOT (10:90) mixture irradiation.

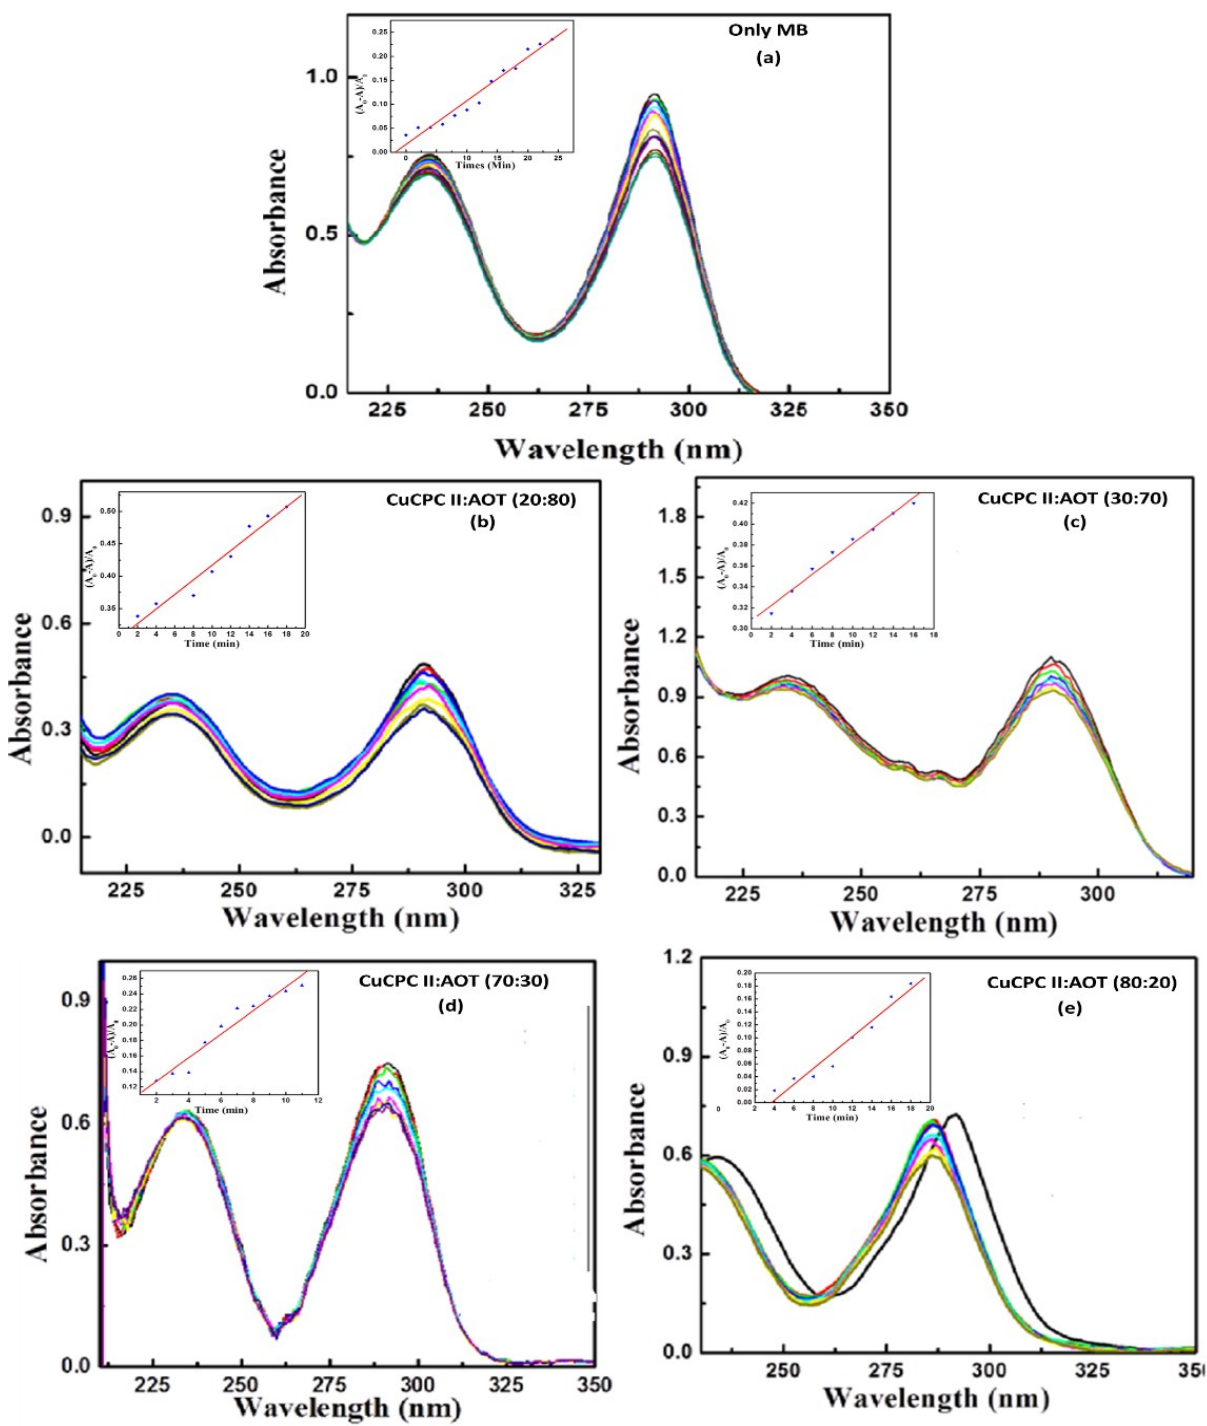

**Figure S5.** Graph of UA quenching in presence of (a) MB dye irradiation, (b) MB with CuCPC II:AOT (20:80) mixture, (c) MB with CuCPC II:AOT (30:70) mixture, (d) MB with CuCPC II:AOT (70:30) mixture, (e) MB with CuCPC II:AOT (80:20) mixture

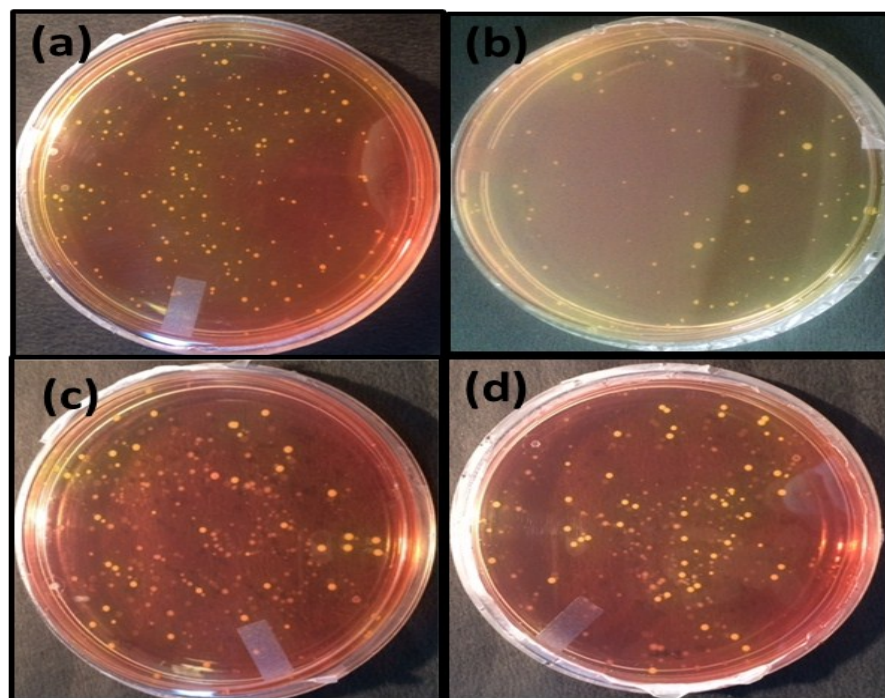

**Figure S6-** *S. aureus* colonies formation (a) Only RB dye (b) RB with laser light (c) only MB dye and (d) MB with laser light.
